# Supplementary material
Source: PubMed Central journal article supplement (PMC3220884)
Supplement: NIHMS330999-supplement-01.pdf [file NIHMS330999-supplement-01.pdf]

Table S1, related to Figure 1. Demographic and clinical characteristics and therapeutic exposures for cases and controls in training and test sets

|                                            | Training Set           |                 |         | Test Set           |                 |         |
|--------------------------------------------|------------------------|-----------------|---------|--------------------|-----------------|---------|
|                                            | t-MDS/AML cases (n=18) | Controls (n=37) | p-value | t-MDS cases (n=16) | Controls (n=20) | p-value |
| Primary diagnosis                          |                        |                 |         |                    |                 |         |
| HL                                         | 1(5.5%)                | 3 (8.1%)        |         | 9 (56%)            | 11 (55%)        |         |
| NHL                                        | 17 (94.5%)             | 34 (91.9%)      |         | 7 (44%)            | 9 (45%)         |         |
| Mean age at diagnosis                      | 48.0                   | 47.2            | 0.76    | 46.5               | 43.7            | 0.14    |
| Male sex                                   | 8 (44.4%)              | 26 (70.3%)      | 0.08    | 13(81%)            | 8 (40%)         | 0.01    |
| Race/ ethnicity                            |                        |                 |         |                    |                 |         |
| Caucasians                                 | 10 (55.6%)             | 24 (64.9%)      |         | 11 (69%)           | 13 (65%)        |         |
| Hispanics                                  | 7 (38.9%)              | 9 (24.3%)       |         | 4 (25%)            | 6 (30%)         |         |
| African-Americans                          | 1 (5.5%)               | 3 (8.1%)        |         | 1 (6%)             | 1 (5%)          |         |
| Asians/Other                               | 0                      | 1 (2.7%)        |         | 0                  | 0               |         |
| Mean age at HCT                            | 49.4                   | 49.4            |         | 49.8               | 45.0            | 0.02    |
| Stem cell source                           |                        |                 | 0.60    |                    |                 | 1.00    |
| Peripheral stem cells                      | 17 (94%)               | 36 (97%)        |         | 15(94%)            | 20 (100%)       |         |
| Bone marrow+PBSC                           | 1 (6%)                 | 1 (3%)          |         | 1 (6%)             | 0               |         |
| Tandem HCTs                                | 1                      | 0               | 0.25    | 1 (6%)             | 4 (20%)         | 0.25    |
| Number of stem cell collections            |                        |                 |         |                    |                 |         |
| Mean (SD)                                  | 7.1 (4.6)              | 5.1 (3.6)       | 0.08    | 7.2 (4.3)          | 6.2 (4.3)       | 0.58    |
| Median (range)                             | 6.0 (1-17)             | 4.0 (1-15)      |         | 6.5 (2-17)         | 4.5 (1-17)      |         |
| Stem cell mobilization (yes)               |                        |                 |         |                    |                 |         |
| G-CSF                                      | 18 (100%)              | 37 (100%)       | --      | 16 (100%)          | 13 (65%)        | 0.01    |
| Etoposide                                  | 2 (11%)                | 0 (0%)          | 0.08    | 3 (19%)            | 2 (10%)         | 0.67    |
| Cyclophosphamide                           | 7(39%)                 | 7 (20%)         | 0.09    | 3 (19%)            | 6 (30%)         | 0.68    |
| Other (taxol)                              | 2 (11%)                | 0               | 0.11    | 0                  | 0               |         |
| Stem cell dose infused                     |                        |                 |         |                    |                 |         |
| Mean (SD)                                  | 5.0 (3.7)              | 6.6 (5.2)       | 0.16    | 5.2 (3.7)          | 6.0 (2.9)       | 0.46    |
| Median (range)                             | 3.5 (0.9-16.2)         | 5.2 (2-26.9)    |         | 4.2 (1.9-16.1)     | 5.0 (2.3-14.2)  |         |
| HCT conditioning                           |                        |                 |         |                    |                 |         |
| Cyclophosphamide                           |                        |                 |         |                    |                 |         |
| Yes                                        | 16 (89%)               | 34 (92%)        | 1.00    | 14 (88%)           | 15 (75%)        | 0.39    |
| Mean (SD)                                  | 3818 (892)             | 4137 (460)      | 0.09    | 4314 (437)         | 4129 (403)      | 0.13    |
| Etoposide                                  |                        |                 |         |                    |                 |         |
| Yes                                        | 18 (100%)              | 37 (100%)       |         | 15 (94%)           | 18 (90%)        | 1.00    |
| Mean (SD)                                  | 2333 (750)             | 2318 (607)      | 0.99    | 2469 (526)         | 2039 (782)      | 0.13    |
| Total body irradiation                     |                        |                 |         |                    |                 |         |
| Yes                                        | 11 (61%)               | 19 (51%)        | 0.58    | 8 (50%)            | 6 (30%)         | 0.36    |
| Mean                                       | 1200                   | 1200            |         | 1230               | 1200            | 0.18    |
| Therapeutic exposures (pre-HCT + post-HCT) |                        |                 |         |                    |                 |         |
| Radiation (Yes)                            | 15(83%)                | 26 (70%)        | 0.53    | 13(81%)            | 11 (55%)        | 0.11    |
| Alkylating agent score                     |                        |                 |         |                    |                 |         |
| 1,2                                        | 11 (61%)               | 15 (41%)        | 0.34    | 3 (19%)            | 7 (35%)         | 0.31    |
| 3, 4, 5                                    | 7 (39%)                | 22 (59%)        |         | 13 (81%)           | 13 (65%)        |         |
| Topoisomerase II inhibitor score           |                        |                 |         |                    |                 |         |
| 2                                          | 5 (28%)                | 9 (24%)         | 0.72    | 4 (25%)            | 8 (40%)         | 0.40    |
| 3, 4                                       | 13 (72%)               | 28 (76%)        |         | 12 (75%)           | 12 (60%)        |         |

**Table S2, related to Figure 1. Clinical characteristics of t-MDS/AML after autologous HCT for lymphoma for the training set**

| Serial No. | Primary Diagnosis | Age at HCT | Sex | Race/ethnicity | Stem cell mobilization | Stem cell dose infused | Conditioning regimen             | Time from aHCT to t-MDS/AML (days) | Cytogenetics                                                                                                                                | Morphology | WBC  | HB   | PLT | Cytopenia                    |
|------------|-------------------|------------|-----|----------------|------------------------|------------------------|----------------------------------|------------------------------------|---------------------------------------------------------------------------------------------------------------------------------------------|------------|------|------|-----|------------------------------|
| 8          | HL                | 32         | M   | H              | GCSF, CTX,VP16         | 3.04                   | Cytosan, VP16, Melphan, TBI      | 913                                | 46,XY [20 of 20 cells]                                                                                                                      | MDS        | 2.4  | 12.1 | 189 | Leukopenia                   |
| 11         | NHL               | 50         | M   | W              | GCSF                   | 4.59                   | BCNU, Cytosan, VP16              | 178                                | 46,XY,del(7)(q22q36) [2 of 22 cells]<br>46,XY,t(7;16)(p13;p13.1) [1]<br>46,XY,?(Y;16)(p11.2;p11.2), t(2;6)(p23;p21.1)                       | RAEB       | 2.4  | 13.9 | 132 | Leukopenia; Thrombocytopenia |
| 24         | NHL               | 56         | M   | W              | GCSF                   |                        | Cytosan,VP16, TBI                | 1351                               | 45,XY,inv(6)(p11.2p25), -7, t(12;14)(p11.2;p11.2)[3 of 30 cells]<br>46,XY,t(2;11)(q37;q13) [1]                                              | MDS        | 3.7  | 10.5 | 258 | Leukopenia; Anemia           |
| 25         | NHL               | 54         | M   | W              | GCSF                   | 7.69                   | Cytosan, VP16, TBI               | 1076                               | 45,X,-Y [5 of 20 cells]<br>47,XY,+8 [4 of 20 cells]<br>46,XY,del(20)(q11.2q13.1) [2 of 20 cells]                                            | MDS        | 6.4  | 13.2 | 111 | Thrombocytopenia             |
| 61         | NHL               | 53         | F   | W              | GCSF                   | 5.77                   | BCNU, Cytosan, VP16              | 1912                               | 46,XX,del(20)(q11.2q13.1) [6 of 30 cells]                                                                                                   | MDS        | 3.2  | 12.2 | 183 | Leukopenia                   |
| 62         | NHL               | 49         | M   | H              | GCSF                   | 4.35                   | Cytosan, VP16, TBI               | 1813                               | 46,XY,der(4)del(4)(q21q25)t(4;22)(q25;q11.1), t(7;12)(q34;q15),del(13)(q12q15),der(22)t(4;22) [3 of 30 cells]<br>46,XY,t(1;11)(q21;q23) [1] | MDS        | 2.9  | 13.9 | 166 | Leukopenia                   |
| 101        | NHL               | 50         | F   | W              | GCSF, CTX,             | 2.49                   | Cytosan,VP16, TBI                | 1171                               | 46,XX,t(7;11)(p13;q23)[20]                                                                                                                  | AML        | 18   | 10.5 | 10  | Leukopenia,, Pancytopenia    |
| 111        | NHL               | 51         | F   | B              | GCSF, CTX,             |                        | Cytosan, VP16, TBI               | 708                                | 45,XX,-7 [20 of 20 cells]                                                                                                                   | AML        | 0.3  | 7.1  | 12  | Pancytopenia                 |
| 120        | NHL               | 50         | F   | W              | GCSF                   | 2.88                   | Cytosan, VP16, TBI               | 1098                               | Nonclonal Aberration: 90, XXX, -X, +3, +4, -5, -5, +6, -9, -9, -10, +11, +12, +13, +14, -15, -16, -18 [1]                                   | MDS        | 3.3  | 12   | 47  | Leukopenia Thrombocytopenia  |
| 125        | NHL               | 52         | F   | W              | GCSF                   | 3.75                   | Cytosan,VP16 TBI                 | 1514                               | 46,XX,del(20)(q11.2q13.1) [10 of 30 cells]                                                                                                  | MDS        | 7.4  | 12.7 | 206 | Normal                       |
| 137        | NHL               | 65         | F   | H              | GCSF, CTX,             |                        | BCNU, Arac, VP16, Melphalan      | 178                                | 46,XX,t(9;11)(p22;q23),add(19)(p13.3) [30 of 30 cells]                                                                                      | AML        | 32.3 | 9.4  | 17  | Anemia, Thrombocytopenia     |
| 155        | NHL               | 42         | M   | W              | GCSF, CTX,             | 2.7                    | Cytosan,VP16, TBI                | 239                                | 46,XY,t(2;12)(p15;q13),del(13)(q12q21),t(20;21)(p11.2;q22) [2 of 30 cells]                                                                  | MDS        | 1.9  | 10.3 | 33  | Pancytopenia                 |
| 168        | NHL               | 28         | F   | W              | GCSF                   | 10.8                   | Cytosan,VP16, Rituxan IN111, Y90 | 728                                | 46,XX,del(20)(q11.2q13.1) [4 of 20 cells]                                                                                                   | MDS        | 6.2  | 13.6 | 262 | Normal                       |
| 231        | NHL               | 53         | F   | H              | GCSF                   | 5.13                   | Cytosan,VP16, Rituxan IN111, Y90 | 204                                | 46,XX,del(13)(q12q22) [9 of 21 cells]                                                                                                       | NA         | 3.8  | 12.2 | 264 | Normal                       |
| 5005       | NHL               | 67         | M   | W              | GCSF                   | 3.34                   | BCNU, Cytosan, VP16              | 926                                | 45,XY,-7 [8 of 20 cells]<br>47,XY,+15 [2 of 20 cells]                                                                                       | MDS        | 3.7  | 12.5 | 149 | Normal                       |
| 5036       | NHL               | 58         | F   | H              | GCSF, CTX, Taxol       | 2.68                   | Cytosan, VP16, Rituxan, TBI      | 524                                | 46,XX [20 of 20 cells]                                                                                                                      | MDS        | 2.9  | 10.7 | 29  | Pancytopenia                 |
| 5040       | NHL               | 29         | F   | H              | GCSF, CTX,VP16         |                        | BCNU, Ara-C, VP16, Melphalan     | 1191                               | 46,XX,t(9;11)(p22;q23) [19 of 20 cells]                                                                                                     | AML        | 4.5  | 12.2 | 26  | Thrombocytopenia             |
| 5042       | NHL               | 52         | M   | H              | GCSF                   | 8.13                   | Cytosan, VP16, TBI               | 1174                               | 42-46,XY, t(1;8)(p34.2;q24.3),-3, -5,-7, ?ins(11;?12)(q23;q13q21.2), add(17)(p11.2)                                                         | RAEB       | 1.4  | 8.6  | 40  | Pancytopenia                 |

Abbreviations: M=male; F=Female; W=white; H=Hispanic; B=black

**Table S3, related to Figure 1 and Table 1. Gene sets, canonical pathways and Gene Ontology categories enriched in genes differentially expressed in PBSC CD34+ cells between t-MDS/AML cases and controls (provided as a separate Excel file)**

**Table S4, related to Figure 1. GSEA analysis of genes differentially expressed in PBSC from cases and controls after removing the 2 cases with transient t-MDS/AML and their controls**

| <b>Increased in t-MDS/AML PBSC</b>                      |            |                  | <b>Increased in control PBSC</b>     |            |                  |
|---------------------------------------------------------|------------|------------------|--------------------------------------|------------|------------------|
| <b>NAME</b>                                             | <b>NES</b> | <b>FDR q-val</b> | <b>NAME</b>                          | <b>NES</b> | <b>FDR q-val</b> |
| HSA04080_NEUROACTIVE_LIGAND_RECEPTOR_INTERACTION        | 2.650688   | <0.001           | ELECTRON_TRANSPORT_CHAIN             | -3.15933   | <0.001           |
| GPCRDB_CLASS_A_RHODOPSIN_LIKE                           | 2.611216   | <0.001           | MOOTHA_VOXPPOS                       | -3.0799    | <0.001           |
| GPCRS_CLASS_A_RHODOPSIN_LIKE                            | 2.443164   | <0.001           | HSA00190_OXIDATIVE_PHOSPHORYLATION   | -3.04706   | <0.001           |
| HSA01430_CELL_COMMUNICATION                             | 2.365203   | 0.002867         | HUMAN_MITODB_6_2002                  | -2.99652   | <0.001           |
| MOREAUX_TACI_HI_VS_LOW_UP                               | 2.317167   | 0.003502         | MITOCHONDRIA                         | -2.99255   | <0.001           |
| PEPTIDE_GPCRS                                           | 2.313133   | 0.002918         | PROTEASOMEPATHWAY                    | -2.88423   | <0.001           |
| HUMAN_TISSUE_LIVER                                      | 2.285419   | 0.002501         | RIBOSOMAL_PROTEINS                   | -2.87936   | <0.001           |
| CARIES_PULP_DN                                          | 2.230311   | 0.003687         | HSA03010_RIBOSOME                    | -2.8533    | <0.001           |
| MONOAMINE_GPCRS                                         | 2.170755   | 0.00667          | TARTE_PLASMA_BLASTIC                 | -2.83713   | <0.001           |
| HALMOS_CEBP_DN                                          | 2.043267   | 0.017537         | CANCER_UNDIFFERENTIATED_META_UP      | -2.75819   | <0.001           |
| GAMMA_HEXACHLOROCYCLOHEXANE_DEGRADATION                 | 1.97882    | 0.025142         | PENG_RAPAMYCIN_DN                    | -2.71085   | <0.001           |
| UVC_HIGH_ALL_UP                                         | 1.957079   | 0.02656          | CANTHARIDIN_DN                       | -2.71076   | <0.001           |
| IGF_VS_PDFG_UP                                          | 1.95353    | 0.025448         | MOREAUX_TACI_HI_IN_PPC_UP            | -2.69927   | <0.001           |
| GH_EXOGENOUS_MIDDLE_UP                                  | 1.935157   | 0.026592         | MOREAUX_TACI_HI_VS_LOW_DN            | -2.69619   | <0.001           |
| VEGF_HUVEC_30MIN_UP                                     | 1.872544   | 0.040946         | OXIDATIVE_PHOSPHORYLATION            | -2.6729    | <0.001           |
| BOQUEST_CD31PLUS_VS_CD31MINUS_DN                        | 1.845108   | 0.051132         | HCC_SURVIVAL_GOOD_VS_POOR_DN         | -2.66091   | <0.001           |
| GERY_CEBP_TARGETS                                       | 1.828249   | 0.053361         | TCA                                  | -2.65011   | <0.001           |
| LEE_MYC_DN                                              | 1.824483   | 0.05173          | UVB_SCC_UP                           | -2.63461   | <0.001           |
| VEGF_MMMEC_6HRS_UP                                      | 1.818545   | 0.04997          | HEARTFAILURE_ATRIA_DN                | -2.59439   | <0.001           |
| STAEGE_EFTS_UP                                          | 1.811746   | 0.050798         | PENG_GlutAMINE_DN                    | -2.57008   | <0.001           |
| GH_EXOGENOUS_ANY_UP                                     | 1.794856   | 0.054716         | BRCA1_OVEREXP_DN                     | -2.55092   | <0.001           |
| ADIP_DIFF_CLUSTER2                                      | 1.79459    | 0.052229         | TRNA_SYNTHETASES                     | -2.53694   | <0.001           |
| LVAD_HEARTFAILURE_UP                                    | 1.733005   | 0.077574         | ROME_INSULIN_2F_UP                   | -2.52322   | <0.001           |
| SCHURINGA_STAT5A_UP                                     | 1.728285   | 0.075347         | KREBS_TCA_CYCLE                      | -2.52253   | <0.001           |
| VEGF_MMMEC_12HRS_UP                                     | 1.720316   | 0.078354         | JAIN_NEMO_DIFF                       | -2.49564   | <0.001           |
| MOREAUX_TACI_HI_IN_BMPC                                 | 1.717426   | 0.076952         | IDX_TSA_UP_CLUSTER3                  | -2.49481   | <0.001           |
| FERRANDO_T_CELL_DIFFERENTIATION_PATHWAY                 | 1.711202   | 0.07813          | PGC                                  | -2.48419   | <0.001           |
| YAO_P4_KO_VS_WT_UP                                      | 1.708963   | 0.075973         | CMV_IE86_UP                          | -2.47819   | <0.001           |
| STRIATED_MUSCLE_CONTRACTION                             | 1.704732   | 0.076221         | RUTELLA_HEPATGFSNDCS_UP              | -2.47462   | <0.001           |
| HSA05217_BASAL_CELL_CARCINOMA                           | 1.697705   | 0.079466         | PROTEASOME_DEGRADATION               | -2.45868   | <0.001           |
| HOX_GENES                                               | 1.692072   | 0.079003         | HSA03050_PROTEASOME                  | -2.45318   | <0.001           |
| CMV_HCMV_6HRS_DN                                        | 1.684333   | 0.081244         | CHANG_SERUM_RESPONSE_UP              | -2.44659   | <0.001           |
| HINATA_NFKB_DN                                          | 1.672483   | 0.084999         | AMINOACYL_TRNA_BIOSYNTHESIS          | -2.44393   | <0.001           |
| EMT_DN                                                  | 1.667348   | 0.08633          | DNA_REPLICATION_REACTOME             | -2.44173   | <0.001           |
| NUCLEAR_RECEPTORS                                       | 1.66686    | 0.084048         | PRMT5_KD_UP                          | -2.44159   | <0.001           |
| CMV_HCMV_TIMECOURSE_8HRS_DN                             | 1.641662   | 0.096376         | SERUM_FIBROBLAST_CORE_UP             | -2.43556   | <0.001           |
| RORIE_ES_PNET_DN                                        | 1.623858   | 0.1069           | WIELAND_HEPATITIS_B_INDUCED          | -2.41563   | <0.001           |
| TSADAC_PANC50_UP                                        | 1.611256   | 0.114336         | HSC_LATEPROGENITORS_SHARED           | -2.41158   | <0.001           |
| KANG_TERT_DN                                            | 1.598205   | 0.122511         | HSC_LATEPROGENITORS_ADULT            | -2.41153   | <0.001           |
| HSA04742_TASTE_TRANSDUCTION                             | 1.595793   | 0.122301         | UVB_NHEK2_UP                         | -2.4094    | <0.001           |
| FRASOR_ER_UP                                            | 1.577758   | 0.135234         | HDACI_COLON_CUR24HRS_UP              | -2.40287   | <0.001           |
| HSA00602_GLYCOSPHINGOLIPID_BIOSYNTHESIS_NEO_LACTOSERIES | 1.573269   | 0.134457         | HSC_INTERMEDIATEPROGENITORS_SHARED   | -2.39969   | <0.001           |
| IDX_TSA_UP_CLUSTER1                                     | 1.556179   | 0.1491           | HSC_INTERMEDIATEPROGENITORS_ADULT    | -2.38435   | <0.001           |
| JECHLINGER_EMT_DN                                       | 1.554442   | 0.147228         | IDX_TSA_UP_CLUSTER5                  | -2.37883   | <0.001           |
| TAKEDA_NUP8_HOXA9_6H_UP                                 | 1.551692   | 0.146235         | RADAEVA_IFNA_UP                      | -2.37015   | <0.001           |
| HSA04340_HEDGEHOG_SIGNALING_PATHWAY                     | 1.550069   | 0.144326         | FERRANDO_MLL_T_ALL_DN                | -2.36861   | 2.55E-04         |
| GH_EXOGENOUS_LATE_UP                                    | 1.543701   | 0.145139         | RCC_NL_UP                            | -2.36775   | 2.50E-04         |
| HSA04512_ECM_RECEPTOR_INTERACTION                       | 1.531886   | 0.154135         | HSC_LATEPROGENITORS_FETAL            | -2.36063   | 2.45E-04         |
| CALCIUM_REGULATION_IN_CARDIAC_CELLS                     | 1.530181   | 0.153304         | SHIPP_FL_VS_DLCL_DN                  | -2.35459   | 2.40E-04         |
| BRENTANI_TRANSCRIPTION_FACTORS                          | 1.51914    | 0.16253          | HSA00970_AMINOACYL_TRNA_BIOSYNTHESIS | -2.35246   | 2.35E-04         |

**A**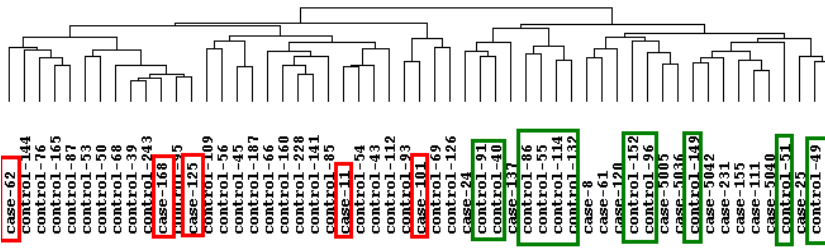**B**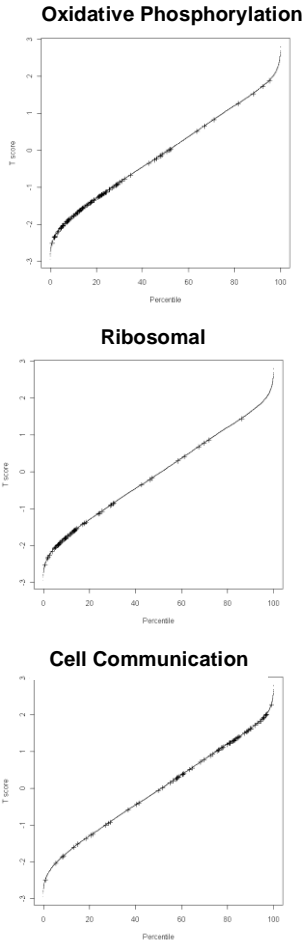**C****Genotoxic and oxidative stress response gene sets**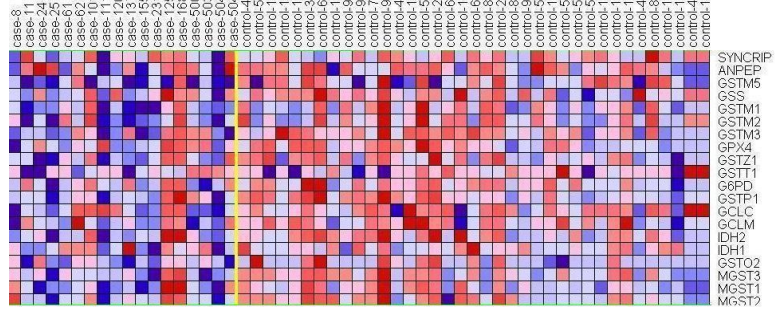**Oxidative phosphorylation gene sets**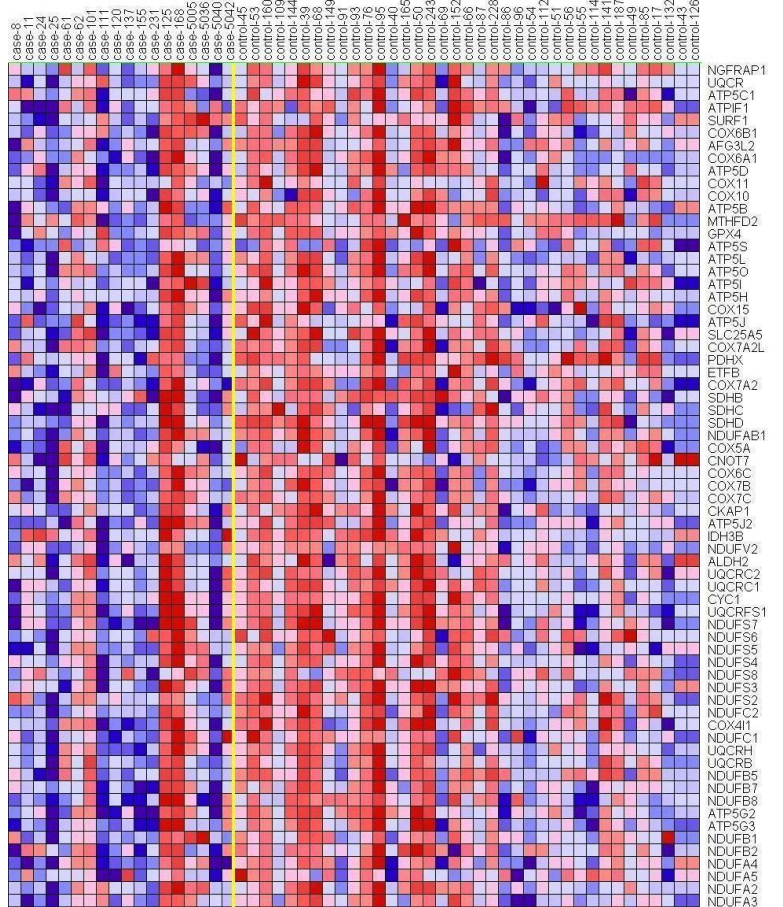**D**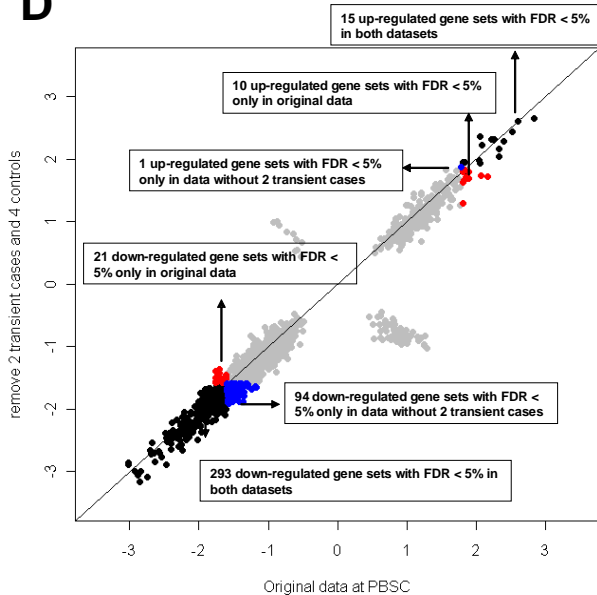**Figure S1**

**Figure S1, related to Figure 1. (A) Hierarchical clustering for PBSC samples with all genes after filtering.** Samples clustered into two large groups. In one cluster 5 cases clustered with 25 controls. In the other cluster 12 cases clustered with 11 controls. **(B) Altered gene expression in PBSC CD34+ cells from t-MDS/AML cases compared with controls.** Enrichment of oxidative phosphorylation, ribosomal and cell communication genes in t-MDS/AML PBSC CD34+ cells compared with controls is shown. **(C) Expression of leading edge genes in cases and controls.** Expression of leading edge genes for genotoxic and oxidative stress response gene sets (top), and oxidative phosphorylation gene sets (bottom) in PBSC CD34+ cells from individual cases and controls is shown. **(D) Gene expression in PBSC from t-MDS/AML cases after removal of 2 cases with transient disease and their matching controls compared with the original PBSC analysis.** 339 gene sets were significantly altered in the original analysis with FDR < 5%; and 403 gene sets were significantly altered in the analysis performed after removal of the 2 cases with transient t-MDS/AML with FDR <5%. The majority (308 gene sets) were common to both analyses.

**Table S5, related to Figure 2 and Table 2. Gene sets, canonical pathways and Gene Ontology categories enriched in genes differentially expressed in BM CD34+ cells between t-MDS/AML cases and controls (provided as a separate Excel file)**

**Table S6, related to Figure 2. Gene sets enriched in differentially expressed gene between normal BM CD34+ cells and CD34+ cells from t-MDS/AML cases or controls (provided as a separate Excel file)**



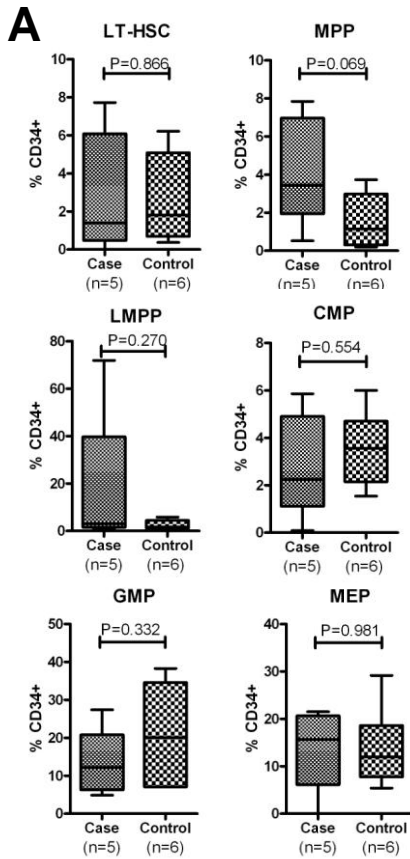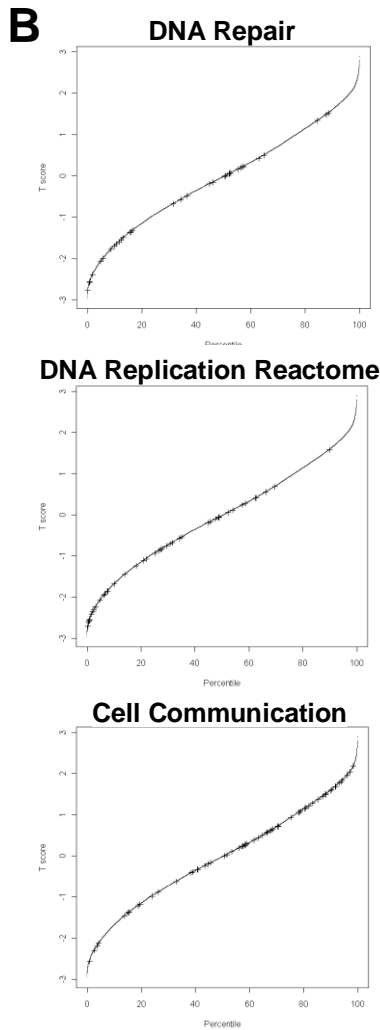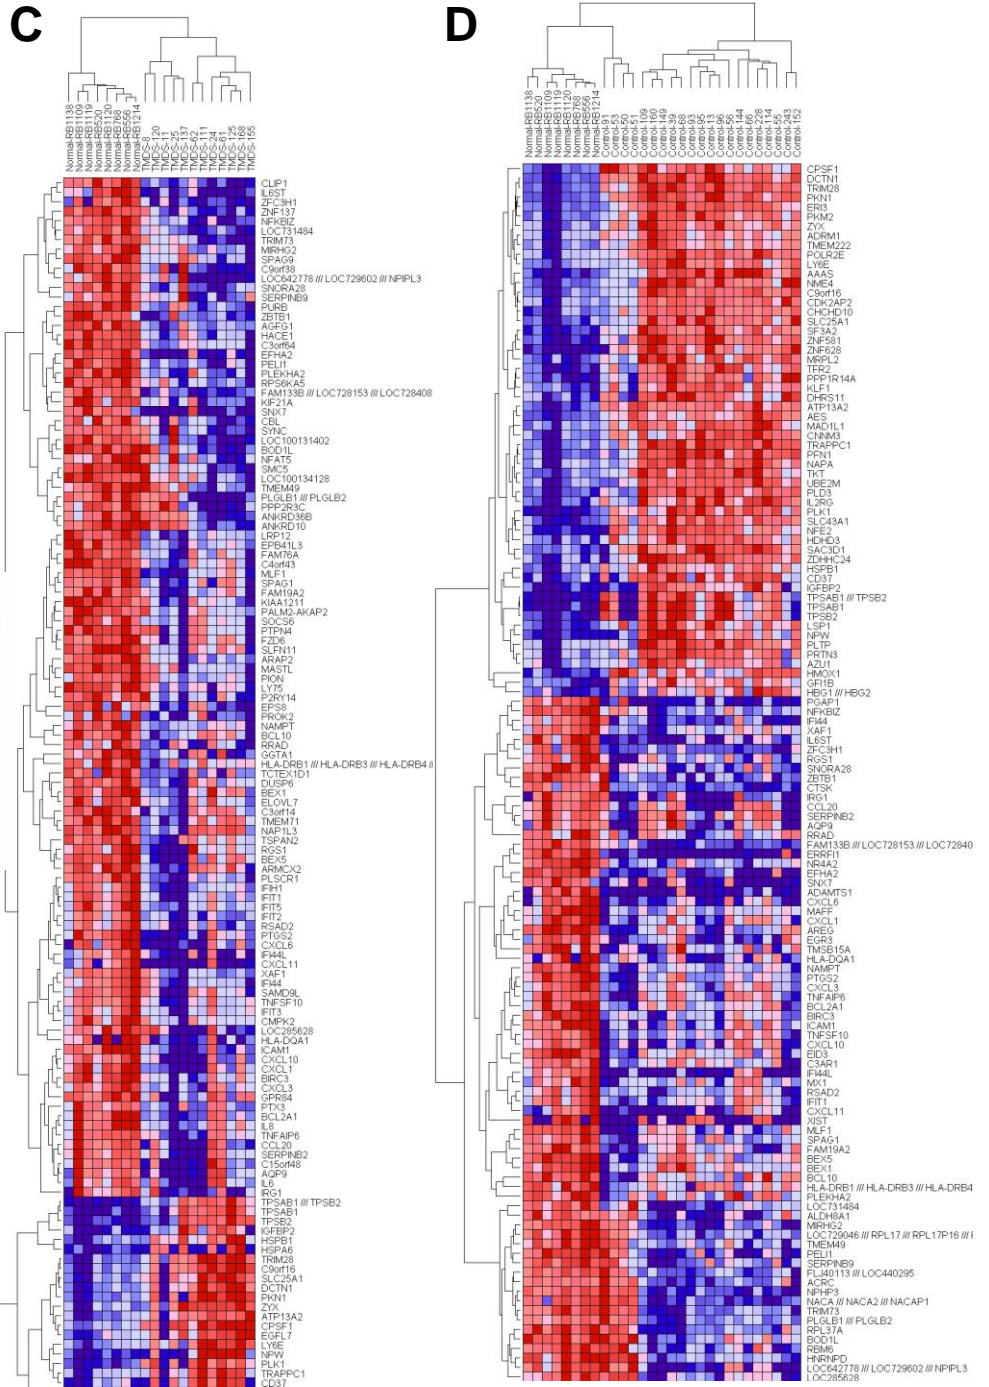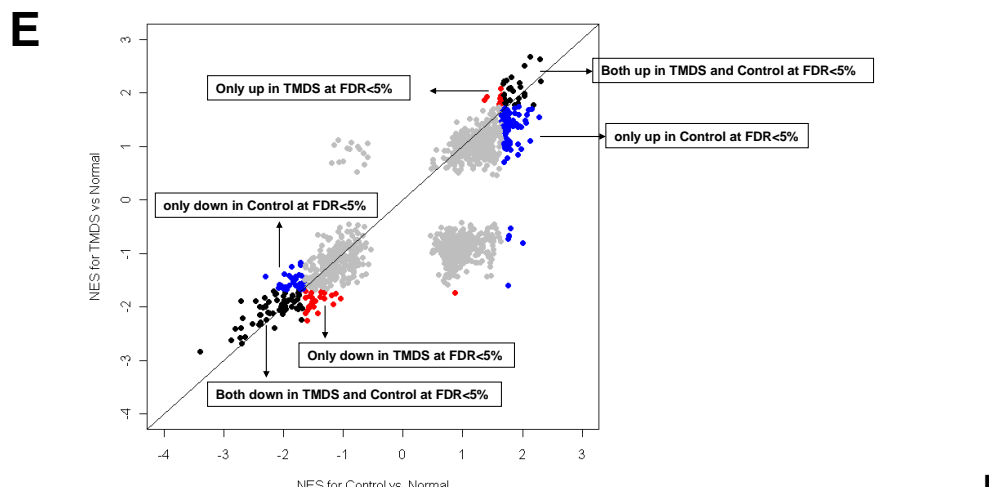

**Figure S2, related to Figure 2. (A) Lack of difference in frequency of subpopulations of BM CD34+ cells from cases at the time of development of t-MDS/AML and controls.** BM cells collected from cases at the time of development of t-MDS/AML and from controls at corresponding time were labeled with lineage markers (CD11b, CD14, Glycophorin A, CD2, CD7, CD10 and CD19), CD34, CD38, CD123, CD90 and CD45RA. CD34+ cells subpopulations including hematopoietic stem cells (HSC; Lin-CD34+CD38-CD45RA-CD90+), multipotent progenitors (MPP; Lin-CD34+CD38-CD45RA-CD90-), lymphoid-primed multipotent progenitors (LMPP; Lin-CD34+CD38-CD45RA+CD90-), common myeloid progenitors (CMP; Lin-CD34+CD38+CD45RA-CD123+), granulocyte-macrophage progenitors (GMP; Lin-CD34+CD38+CD45RA+CD123+) and megakaryocyte-erythroid progenitors (MEP; Lin-CD34+CD38+CD45RA-CD123-) were analyzed using multi-color flow cytometry. No significant difference in frequency of different CD34+ subpopulations was observed between cases and controls. Results represent the median, inter-quartile range and range of values. **(B) Altered gene expression in BM CD34+ cells from t-MDS/AML cases compared with controls.** Enrichment of DNA Repair, Cell communication, and DNA replication reactome genes in BM CD34+ cells at time of t-MDS/AML compared with controls. **(C) Gene expression in BM CD34+ cells from t-MDS/AML patients compared to normal BM CD34+ cells.** Gene expression in 8 normal samples and 12 t-MDS samples were compared using t-test: The heat map represents genes differentially expressed between the two groups using a threshold of FDR<5% and abs(logFC)>2 (n=133 genes). **(D) Gene expression in BM CD34+ cells from control NHL/HL patients that did not develop t-MDS/AML after aHCT compared to normal BM CD34+ cells.** Gene expression in 8 normal samples and 21 t-MDS samples were compared using t-test: The heat map represents genes differentially expressed between the two groups using a threshold of FDR<5% and abs(logFC)>2 (n=128 genes). **(E) Gene expression in BM CD34+ cells from NHL/HL patients that did or did not develop t-MDS/AML compared to normal BM CD34+ cells.** Normalized enrichment scores (NES) from GSEA analyses for altered gene sets in BM CD34+ cells from patients at time of t-MDS/AML compared with normal BM CD34+ cells were plotted against NES for altered gene sets in BM CD34+ cells from controls that did not develop t-MDS/AML after aHCT. Gene sets that were significantly upregulated or downregulated in both t-MDS/AML and control samples with FDR <5% are highlighted in black. Those altered only in t-MDS/AML samples in red; and those altered only in controls in blue.

**Table S7, related to Figure 3. GSEA analysis of genes showing significant increase or decrease in expression over time from PBSC collection to development of t-MDS/AML in cases compared with controls over a similar time period**

| Enriched in Cases                    |      |           | Enriched in Controls                       |       |           |
|--------------------------------------|------|-----------|--------------------------------------------|-------|-----------|
| Gene set                             | NES  | FDR q-val | Gene set                                   | NES   | FDR q-val |
| HSA03010_RIBOSOME                    | 2.88 | <0.001    | UVC_XPCS_ALL_DN                            | -2.74 | <0.001    |
| HSA00190_OXIDATIVE_PHOSPHORYLATION   | 2.73 | <0.001    | UVC_XPCS_4HR_DN                            | -2.73 | <0.001    |
| RIBOSOMAL_PROTEINS                   | 2.71 | <0.001    | UVC_XPCS_8HR_DN                            | -2.71 | <0.001    |
| MOOTHA_VOXPPOS                       | 2.53 | <0.001    | UVC_TTD_ALL_DN                             | -2.56 | <0.001    |
| ELECTRON_TRANSPORT_CHAIN             | 2.50 | <0.001    | UVC_TTD_4HR_DN                             | -2.50 | <0.001    |
| OXIDATIVE_PHOSPHORYLATION            | 2.31 | <0.001    | HADDAD_HSC_CD10_UP                         | -2.46 | <0.001    |
| HEMATOP_STEM_ALL_UP                  | 2.16 | 0.001     | UVB_NHEK1_DN                               | -2.46 | <0.001    |
| HUMAN_MITODB_6_2002                  | 2.16 | 0.001     | HADDAD_HPCLYMPHO_ENRICHED                  | -2.43 | <0.001    |
| LE_MYELIN_DN                         | 2.07 | 0.007     | GOLDRATH_CELLCYCLE                         | -2.33 | <0.001    |
| HOUSTIS_ROS                          | 2.06 | 0.007     | DOX_RESIST_GASTRIC_UP                      | -2.30 | <0.001    |
| NAKAJIMA_MCSMBP_MAST                 | 2.05 | 0.008     | CHEN_HOXA5_TARGETS_UP                      | -2.30 | <0.001    |
| MITOCHONDRIA                         | 2.03 | 0.010     | UVC_TTD-XPCS_COMMON_DN                     | -2.27 | <0.001    |
| TRNA_SYNTHETASES                     | 2.00 | 0.011     | RAC1PATHWAY                                | -2.25 | <0.001    |
| HSA03020_RNA_POLYMERASE              | 1.99 | 0.011     | GLEEVECPATHWAY                             | -2.23 | 0.001     |
| BRUNO_IL3_DN                         | 1.98 | 0.014     | ATMPATHWAY                                 | -2.21 | 0.002     |
| HYPOPHYSECTOMY_RAT_UP                | 1.95 | 0.016     | SERUM_FIBROBLAST_CELLCYCLE                 | -2.17 | 0.003     |
| UVB_NHEK2_UP                         | 1.91 | 0.023     | HSA05213_ENDOMETRIAL_CANCER                | -2.14 | 0.004     |
| IRS_KO_ADIP_UP                       | 1.91 | 0.022     | ZHAN_MM_CD138_PR_VS_REST                   | -2.12 | 0.003     |
| HSA00480_GLUTATHIONE_METABOLISM      | 1.91 | 0.022     | TARTE_BCELL                                | -2.08 | 0.004     |
| HEARTFAILURE_VENTRICLE_DN            | 1.89 | 0.025     | YU_CMYC_DN                                 | -2.07 | 0.004     |
| POMEROY_DESMOPLASIC_VS_CLASSIC_MD_UP | 1.89 | 0.025     | TAKEDA_NUP8_HOXA9_16D_DN                   | -2.07 | 0.005     |
| INNEREAR_UP                          | 1.87 | 0.027     | REOVIRUS_HEK293_UP                         | -2.07 | 0.004     |
| IDX_TSA_UP_CLUSTER5                  | 1.86 | 0.030     | UVB_NHEK1_C6                               | -2.07 | 0.004     |
| AGED_MOUSE_HYPOTH_UP                 | 1.84 | 0.035     | UVC_HIGH_ALL_DN                            | -2.05 | 0.005     |
| ATP_SYNTHESIS                        | 1.83 | 0.034     | TNFR2PATHWAY                               | -2.05 | 0.004     |
| PENG_RAPAMYCIN_DN                    | 1.83 | 0.033     | NOVA2_KO_SPLICING                          | -2.04 | 0.004     |
| IFN_BETA_GLIOMA_DN                   | 1.83 | 0.032     | FSH_OVARY_MCV152_DN                        | -2.02 | 0.006     |
| HSA00710_CARBON_FIXATION             | 1.81 | 0.042     | UVB_NHEK3_C5                               | -1.98 | 0.010     |
| PASSERINI_OXIDATION                  | 1.79 | 0.046     | SIG_PIP3_SIGNALING_IN_B_LYMPHOCYTES        | -1.97 | 0.010     |
| GLUTATHIONE_METABOLISM               | 1.79 | 0.046     | PTENPATHWAY                                | -1.97 | 0.011     |
| UVB_NHEK1_C1                         | 1.78 | 0.048     | HSA05212_PANCREATIC_CANCER                 | -1.97 | 0.012     |
| PGC                                  | 1.76 | 0.056     | HSC_MATURE_SHARED                          | -1.97 | 0.012     |
| HSA00100_BIOSYNTHESIS_OF_STEROIDS    | 1.75 | 0.064     | HDAC1_COLON_SUL48HRS_UP                    | -1.96 | 0.011     |
| ELECTRON_TRANSPORT                   | 1.75 | 0.065     | STRESS_GENOTOXIC_SPECIFIC_DN               | -1.95 | 0.012     |
| FRUCTOSE_AND_MANNANOSE_METABOLISM    | 1.74 | 0.064     | LINDSTEDT_DEND_UP                          | -1.95 | 0.012     |
| MYC_TARGETS                          | 1.74 | 0.063     | AKTPATHWAY                                 | -1.95 | 0.012     |
| GLYCOLYSIS_AND_GLUONEOGENESIS        | 1.72 | 0.078     | UVC_TTD_8HR_DN                             | -1.93 | 0.013     |
| HSA00620_PYRUVATE_METABOLISM         | 1.72 | 0.076     | TCRPATHWAY                                 | -1.93 | 0.014     |
| PHOTOSYNTHESIS                       | 1.71 | 0.077     | CMV_HCMV_TIMECOURSE_4HRS_DN                | -1.93 | 0.014     |
| ADIP_VS_FIBRO_UP                     | 1.71 | 0.075     | HSA05210_COLORECTAL_CANCER                 | -1.92 | 0.015     |
| ALCALAY_AML_NPMC_UP                  | 1.70 | 0.084     | ET743_SARCOMA_24HRS_DN                     | -1.90 | 0.018     |
| TYPE_III_SECRETION_SYSTEM            | 1.70 | 0.082     | CMV_HCMV_TIMECOURSE_16HRS_DN               | -1.90 | 0.019     |
| SANA_IFNG_ENDOTHELIAL_DN             | 1.69 | 0.084     | IGF1RPATHWAY                               | -1.90 | 0.018     |
| FLAGELLAR_ASSEMBLY                   | 1.69 | 0.083     | APOPTOSIS                                  | -1.89 | 0.019     |
| MUNSHI_MM_UP                         | 1.68 | 0.085     | IFNA_HCMV_6HRS_UP                          | -1.89 | 0.018     |
| ADIP_VS_PREADIP_UP                   | 1.68 | 0.084     | ROTH_HTERT_DIFF                            | -1.89 | 0.018     |
| ROS_MOUSE_AORTA_UP                   | 1.68 | 0.084     | HSA04664_FC_EPSILON_RI_SIGNALING_PATHWAY   | -1.88 | 0.019     |
| ELECTRON_TRANSPORTER_ACTIVITY        | 1.68 | 0.083     | HSA04662_B_CELL_RECEPTOR_SIGNALING_PATHWAY | -1.88 | 0.019     |
| HIPPOCAMPUS_DEVELOPMENT_PRENATAL     | 1.66 | 0.089     | CROONQUIST_IL6_RAS_DN                      | -1.88 | 0.019     |
| HSA00052_GALACTOSE_METABOLISM        | 1.66 | 0.092     | IL2RBPATHWAY                               | -1.86 | 0.020     |

Ninety-five gene sets were enriched in cases with FDR < 25%, and 288 gene sets were enriched in controls. Abbreviations: GSEA= gene set enrichment analysis; NES= normalized enrichment score; FDR= false discovery rate

**Table S8, related to Figure 4. Clinical characteristics of t-MDS/AML cases in test sets and comparison of clinical and demographic characteristics and therapeutic exposures of t-MDS/AML cases in the training and test sets (provided as a separate Excel file)**

**Table S9, related to Figure 4. Gene sets enriched in PBSC CD34+ cells from t-MDS/AML cases in test set**

| Enriched in case                                        |      | Enriched in controls |                                         |       |           |
|---------------------------------------------------------|------|----------------------|-----------------------------------------|-------|-----------|
| Gene set                                                | NES  | FDR q-val            | Gene set                                | NES   | FDR q-val |
| HSA04080_NEUROACTIVE_LIGAND_RECEPTOR_INTERACTION        | 3.89 | <0.001               | MOREAUX_TACI_HI_VS_LOW_DN               | -4.85 | <0.001    |
| GPCRDB_CLASS_A_RHODOPSIN_LIKE                           | 3.35 | <0.001               | FLECHNER_KIDNEY_TRANSPLANT_WELL_UP      | -4.68 | <0.001    |
| MOREAUX_TACI_HI_VS_LOW_UP                               | 3.02 | <0.001               | TARTE_PLASMA_BLASTIC                    | -4.40 | <0.001    |
| PEPTIDE_GPCRS                                           | 2.86 | <0.001               | UVC_XPCS_8HR_DN                         | -4.35 | <0.001    |
| HSA01430_CELL_COMMUNICATION                             | 2.86 | <0.001               | HCC_SURVIVAL_GOOD_VS_POOR_DN            | -4.29 | <0.001    |
| GPCRS_CLASS_A_RHODOPSIN_LIKE                            | 2.83 | <0.001               | UVC_TTD_4HR_DN                          | -4.23 | <0.001    |
| MONOAMINE_GPCRS                                         | 2.62 | <0.001               | ET743_SARCOMA_DN                        | -4.15 | <0.001    |
| GH_EXOGENOUS_MIDDLE_UP                                  | 2.49 | <0.001               | HSA03010_RIBOSOME                       | -4.06 | <0.001    |
| IGF_VS_PDGF_UP                                          | 2.47 | <0.001               | BRCA1_OVEREXP_UP                        | -4.01 | <0.001    |
| HSA04950_MATURITY_ONSET_DIABETES_OF_THE_YOUNG           | 2.47 | <0.001               | UVC_XPCS_ALL_DN                         | -4.00 | <0.001    |
| HSA04020_CALCIUM_SIGNALING_PATHWAY                      | 2.46 | <0.001               | UVC_TTD_ALL_DN                          | -3.95 | <0.001    |
| GPCRDB_OTHER                                            | 2.38 | <0.001               | HUMAN_MITODB_6_2002                     | -3.93 | <0.001    |
| GH_EXOGENOUS_ANY_UP                                     | 2.37 | <0.001               | ET743_SARCOMA_72HRS_DN                  | -3.90 | <0.001    |
| HSA04742_TASTE_TRANSDUCTION                             | 2.35 | 0.001                | PENG_RAPAMYCIN_DN                       | -3.88 | <0.001    |
| HUMAN_TISSUE_LIVER                                      | 2.27 | 0.002                | HSC_LATEPROGENITORS_SHARED              | -3.87 | <0.001    |
| HSA04340_HEDGEHOG_SIGNALING_PATHWAY                     | 2.15 | 0.006                | UVB_NHEK1_DN                            | -3.86 | <0.001    |
| LEE_ACOX1_DN                                            | 2.15 | 0.005                | ROME_INSULIN_2F_UP                      | -3.86 | <0.001    |
| LEE_CIP_DN                                              | 2.09 | 0.010                | MITOCHONDRIA                            | -3.85 | <0.001    |
| GAMMA_HEXACHLOROCYCLOHEXANE_DEGRADATION                 | 2.01 | 0.018                | RCC_NL_UP                               | -3.85 | <0.001    |
| HSA05217_BASAL_CELL_CARCINOMA                           | 2.01 | 0.018                | ET743_SARCOMA_48HRS_DN                  | -3.84 | <0.001    |
| REFRACTORY_GASTRIC_UP                                   | 1.95 | 0.029                | UVB_NHEK3_ALL                           | -3.84 | <0.001    |
| HSA00591_LINOLEIC_ACID_METABOLISM                       | 1.94 | 0.030                | RIBOSOMAL_PROTEINS                      | -3.77 | <0.001    |
| RORIE_ES_PNET_DN                                        | 1.94 | 0.029                | HSC_LATEPROGENITORS_ADULT               | -3.73 | <0.001    |
| MOREAUX_TACI_HI_IN_BMPC                                 | 1.89 | 0.041                | STEMCELL_COMMON_UP                      | -3.73 | <0.001    |
| BCNU_GLIOMA_MGMT_48HRS_DN                               | 1.87 | 0.044                | FLECHNER_KIDNEY_TRANSPLANT_WELL_PBL_UP  | -3.72 | <0.001    |
| WNT_TARGETS                                             | 1.84 | 0.053                | PENG_LEUCINE_DN                         | -3.65 | <0.001    |
| CELL_ADHESION                                           | 1.82 | 0.061                | HSC_LATEPROGENITORS_FETAL               | -3.61 | <0.001    |
| ST_WNT_CA2_CYCLIC_GMP_PATHWAY                           | 1.81 | 0.059                | UVB_SCC_UP                              | -3.61 | <0.001    |
| STAEGE_EFTS_UP                                          | 1.80 | 0.064                | UVC_XPCS_4HR_DN                         | -3.61 | <0.001    |
| GPCRS_CLASS_B_SECRETIN_LIKE                             | 1.78 | 0.072                | MRNA_PROCESSING_REACTOME                | -3.60 | <0.001    |
| GPCRDB_CLASS_B_SECRETIN_LIKE                            | 1.78 | 0.070                | PENG_GlutAMINE_DN                       | -3.55 | <0.001    |
| HSA00602_GLYCOSPHINGOLIPID_BIOSYNTHESIS_NEO_LACTOSERIES | 1.77 | 0.072                | MOREAUX_TACI_HI_IN_PPC_UP               | -3.55 | <0.001    |
| HSA04512_ECM_RECEPTOR_INTERACTION                       | 1.76 | 0.074                | ET743_SARCOMA_24HRS_DN                  | -3.52 | <0.001    |
| NUCLEAR_RECEPTORS                                       | 1.76 | 0.072                | SERUM_FIBROBLAST_CORE_UP                | -3.52 | <0.001    |
| TESTIS_EXPRESSED_GENES                                  | 1.75 | 0.075                | LEE_TCELLS10_UP                         | -3.50 | <0.001    |
| HINATA_NFKB_DN                                          | 1.74 | 0.078                | RUTELLA_HEPATGFNSNDCS_UP                | -3.48 | <0.001    |
| HTERT_DN                                                | 1.73 | 0.080                | LEE_TCELLS8_UP                          | -3.47 | <0.001    |
| HALMOS_CEBP_DN                                          | 1.73 | 0.079                | UVC_HIGH_ALL_DN                         | -3.46 | <0.001    |
| HSIAO_LIVER_SPECIFIC_GENES                              | 1.72 | 0.081                | HSC_EARLYPROGENITORS_FETAL              | -3.45 | <0.001    |
| CELL_ADHESION_MOLECULE_ACTIVITY                         | 1.72 | 0.079                | HDAC1_COLON_SUL_UP                      | -3.45 | <0.001    |
| STRIATED_MUSCLE_CONTRACTION                             | 1.72 | 0.078                | UVC_TTD-XPCS_COMMON_DN                  | -3.40 | <0.001    |
| HCC_SURVIVAL_GOOD_VS_POOR_UP                            | 1.70 | 0.088                | VERHAAK_AML_NPM1_MUT_VS_WT_UP           | -3.40 | <0.001    |
| HUMAN_TISSUE_PLACENTA                                   | 1.68 | 0.100                | GOLDRATH_HP                             | -3.40 | <0.001    |
| DAC_PANC_UP                                             | 1.67 | 0.101                | PRMT5_KD_UP                             | -3.39 | <0.001    |
| TYROSINE_METABOLISM                                     | 1.67 | 0.102                | BASSO_REGULATORY_HUBS                   | -3.39 | <0.001    |
| INTRINSICPATHWAY                                        | 1.65 | 0.111                | REOVIRUS_HEK293_UP                      | -3.39 | <0.001    |
| SCHURINGA_STAT5A_UP                                     | 1.64 | 0.118                | LEE_TCELLS1_UP                          | -3.38 | <0.001    |
| JNK_UP                                                  | 1.64 | 0.118                | BYSTRYKH_HSC_CIS_GLOCUS                 | -3.37 | <0.001    |
| PASSERINI_GROWTH                                        | 1.64 | 0.117                | PGC                                     | -3.37 | <0.001    |
| GH_EXOGENOUS_ALL_UP                                     | 1.61 | 0.130                | FLECHNER_KIDNEY_TRANSPLANT_REJECTION_DN | -3.36 | <0.001    |

Abbreviations: NES=normalized enrichment score; FDR=false discovery rate

**Table S10, related to Figure 4. Thirty eight gene signature associated with t-MDS/AML**

| <b>Gene ID</b> | <b>Description</b>                                                               |
|----------------|----------------------------------------------------------------------------------|
| NR4A2          | nuclear receptor subfamily 4, group A, member 2                                  |
| FOS            | v-fos FBJ murine osteosarcoma viral oncogene homolog                             |
| EGR1           | early growth response 1                                                          |
| CARD6          | caspase recruitment domain family, member 6                                      |
| PEX11B         | peroxisomal biogenesis factor 11 beta                                            |
| EGR3           | early growth response 3                                                          |
| EGR4           | early growth response 4                                                          |
| MRPL15         | mitochondrial ribosomal protein L15                                              |
| SLC7A11        | solute carrier family 7, (cationic amino acid transporter, y+ system) member 11  |
| REEP1          | receptor accessory protein 1                                                     |
| FOSB           | FBJ murine osteosarcoma viral oncogene homolog B                                 |
| GOLGA5         | golgi autoantigen, golgin subfamily a, 5                                         |
| ACTL6A         | actin-like 6A                                                                    |
| GOLPH3L        | golgi phosphoprotein 3-like                                                      |
| CCDC99         | coiled-coil domain containing 99                                                 |
| SMAD7          | SMAD family member 7                                                             |
| SHMT2          | serine hydroxymethyltransferase 2 (mitochondrial)                                |
| LRPPRC         | leucine-rich PPR-motif containing                                                |
| CDCA4          | cell division cycle associated 4                                                 |
| PDIA4          | protein disulfide isomerase family A, member 4                                   |
| GOT1           | glutamic-oxaloacetic transaminase 1, soluble (aspartate aminotransferase 1)      |
| RTN3           | reticulon 3                                                                      |
| KLF2           | Kruppel-like factor 2 (lung)                                                     |
| JUN            | jun oncogene                                                                     |
| STK17B         | serine/threonine kinase 17b                                                      |
| PSMC2          | proteasome (prosome, macropain) 26S subunit, ATPase, 2                           |
| LRBA           | LPS-responsive vesicle trafficking, beach and anchor containing                  |
| XPOT           | exportin, tRNA (nuclear export receptor for tRNAs)                               |
| ZYG11B         | zyg-11 homolog B (C. elegans)                                                    |
| ZNF137         | zinc finger protein 137                                                          |
| GEM            | GTP binding protein overexpressed in skeletal muscle                             |
| PGRMC2         | progesterone receptor membrane component 2                                       |
| ARL6IP6        | ADP-ribosylation-like factor 6 interacting protein 6                             |
| SLC2A3P1       | Solute carrier family 2 (facilitated glucose transporter), member 3 pseudogene 1 |
| NR4A3          | nuclear receptor subfamily 4, group A, member 3                                  |
| RGS2           | regulator of G-protein signaling 2, 24kDa                                        |
| NRIP3          | nuclear receptor interacting protein 3                                           |
| SLC26A2        | solute carrier family 26 (sulfate transporter), member 2                         |

**Table S11, related to Figure 4. Cytogenetic analysis of t-MDS/AML cases at pre-HCT time point (provided as a separate Excel file)**

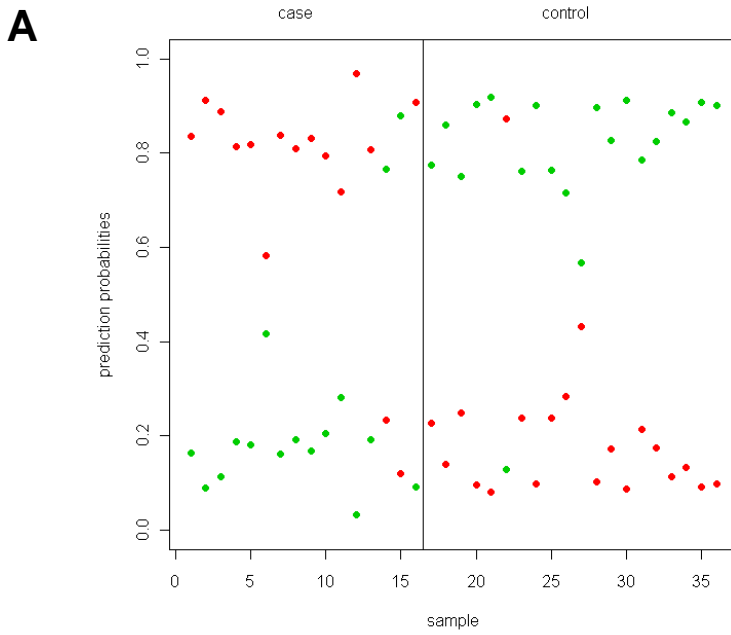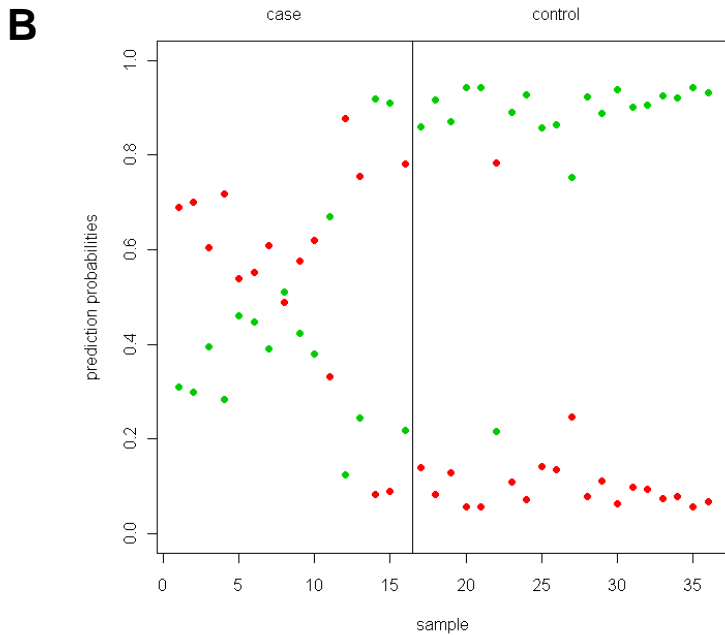

**Figure S3, related to Figure 4. (A) Prediction probabilities for t-MDS/AML versus control status in test set using the 38-gene signature.** We applied the 38-gene signature derived from the training set to the test set. The posterior probabilities of being t-MDS/AML (red) or control (green) are shown. The signature successfully predicted disease status for the majority of the subjects. All controls were predicted correctly, except one subject. There are 2 misclassifications in predicting t-MDS/AML. Most subjects were classified with high prediction probability. **(B) Prediction probabilities for t-MDS/AML versus control status in test set using the 31-gene signature.** The 2 cases with transient t-MDS/AML and their controls were removed from the training sets for the analysis and a 31-gene signature selected with lowest prediction error in cross-validation. Application of the 31-gene signature to the test set misclassified 4/16 cases as controls and 1/20 controls as cases in the test set.



A.

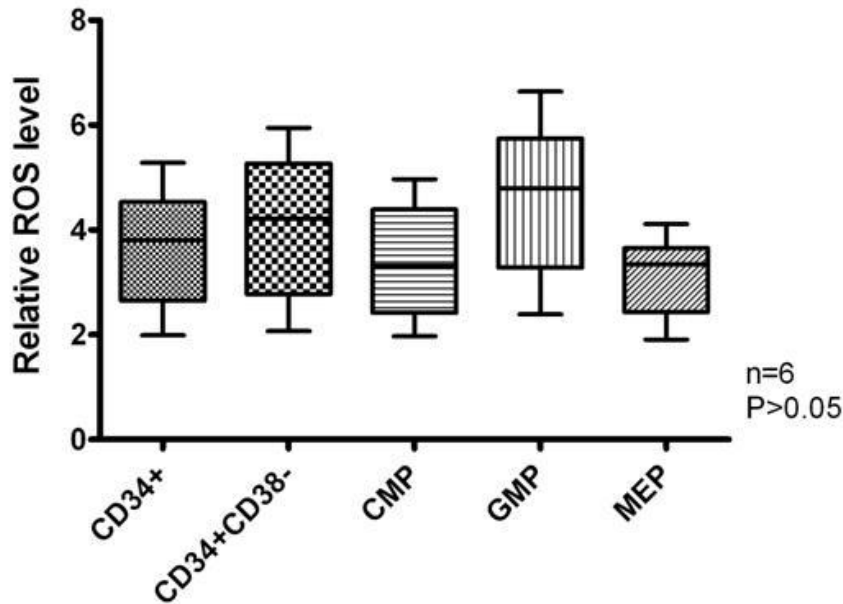

B.

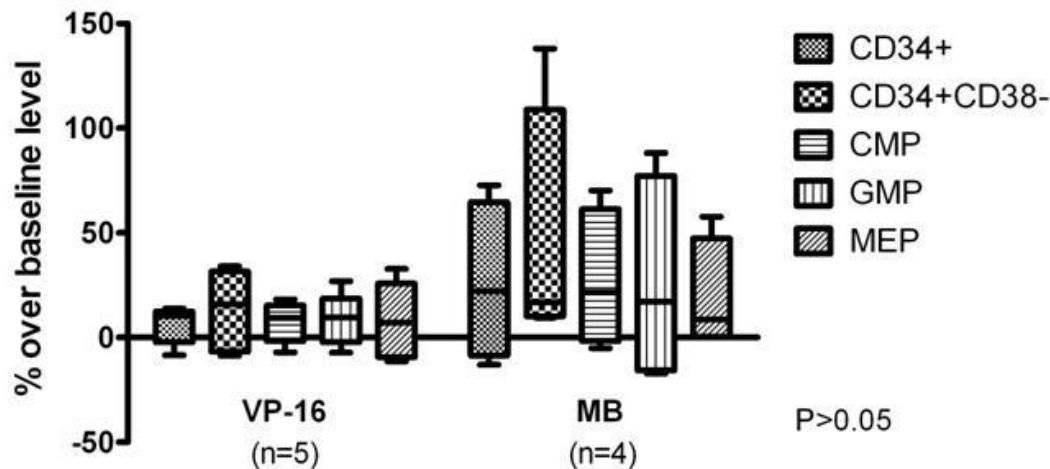

**Figure S4, related to Figure 5. Lack of difference in ROS levels in different subpopulations of CD34+ cells obtained from normal PBSC samples.** Normal PBSC MNCs were treated with or without etoposide (VP-16) and methylene blue with visible light (MB) and stained with lineage markers (CD11b, CD14, Glycophorin A, CD2, CD7, CD10 and CD19), CD34, CD38, CD123, CD45RA and ROS indicator C-H2DCFDA. ROS levels in different CD34 subpopulations including HSC (Lin-CD34+CD38-), CMP (Lin-CD34+CD38+CD45RA-CD123+), GMP (Lin-CD34+CD38+CD45RA+CD123+) and MEP (Lin-CD34+CD38+CD45RA-CD123-) as well as total CD34+ cells were analyzed using multi-color flow cytometry. **(A) Baseline ROS levels in different CD34 subpopulations from normal PBSC samples.** There was no significant difference among different CD34 subpopulations. Results represent median, interquartile range and range of values. **(B) ROS levels in different CD34 subpopulations of normal PBSC measured 2 hours after exposure to etoposide (VP-16) and methylene blue with visible light (MB).** No significant difference among different CD34 subpopulations was observed. Results represent median, interquartile range and range of values.

## Supplemental Experimental Procedures

### Statistical analysis

For quality control of microarray data, images of the individual arrays were screened for experimental error; Affymetrix MAS 5 report was checked for background expression, scale factors and percent of present calls; and RNA degradation was examined by beta-actin 3/5 and GAPDH 3/5 ratios using Affymetrix internal controls. No obvious batch effect was observed. Data were normalized using robust multiarray averages with consideration of GC content (GCRMA), where only the probes with present call were used to estimate the background, with subsequent applications of quantile normalization and median polishing. The normalization was carried out separately for PBSC samples obtained pre-aHCT and for BM samples collected at the time of t-MDS/AML/AML or at comparable time points after aHCT for controls. The Affymetrix annotation file was used to map probesets to genes. Expression of genes represented by multiple probesets was set as the median of the probesets.

For Gene set enrichment analysis (GSEA), the pre-ranked gene list was used to test all the 1383 gene sets (with size of [15, 500]) in the C-2 category of the GSEA Molecular Signatures Database, representing curated gene sets collected from various sources including online pathway databases, biomedical literature, and the L2L database of published microarray gene expression data. Where multiple significant gene sets were related to each other, analysis was performed to identify a subset of common enriched genes. Average gene expression was calculated for each set and heatmaps plotted to show the contrasts between cases and controls. Gene Ontology (GO) and pathway analysis was performed, retaining genes with z-scores  $\geq 1.8$  or  $\leq -1.8$ , and  $\geq 1.5$ -fold change in OR between cases and controls.

Pre-processing, normalization and filtering procedures for the test set were identical to the training set. PAM was used to derive a prognostic gene signature from the training set to classify patients as case or control. PAM uses the “nearest shrunken centroid” approach and 10-fold cross-validation to select a parsimonious gene expression signature that can classify samples with minimal misclassification. PAM was applied to genes common to both datasets.
